# Supplementary material
Source: PubMed Central journal article supplement (PMC3080134)

## SUPPLEMENTARY INFORMATION

### SUPPLEMENTARY TABLES

**Table S1. Patients, time points and number of sequences analyzed.**

| Subject | Patient number | CCR5 genotype  | Disease progression | Sampling time after SC (months) | gp120 env (nr of clones) |
|---------|----------------|----------------|---------------------|---------------------------------|--------------------------|
| P1      | 19858          | WT/WT          | P                   | 42*                             | 8                        |
|         |                |                |                     | 69*                             | 5                        |
|         |                |                |                     | 92*                             | 4                        |
|         |                |                |                     | 113*                            | 6                        |
| P2      | 19576          | WT/WT          | P                   | 7                               | 2                        |
|         |                |                |                     | 29                              | 4                        |
|         |                |                |                     | 43                              | 5                        |
|         |                |                |                     | 51                              | 5                        |
| P3      | 19947          | WT/WT          | P                   | 56*                             | 3                        |
|         |                |                |                     | 98*                             | 3                        |
| P4      | 19999          | WT/WT          | P                   | 4                               | 14                       |
|         |                |                |                     | 26                              | 16                       |
|         |                |                |                     | 42                              | 5                        |
|         |                |                |                     | 74                              | 7                        |
|         |                |                |                     | 107                             | 20                       |
| P5      | 19768          | WT/WT          | P                   | 2                               | 21                       |
|         |                |                |                     | 36                              | 15                       |
|         |                |                |                     | 67                              | 17                       |
|         |                |                |                     | 93                              | 12                       |
| P6      | 19659          | WT/WT          | P                   | 2                               | 1                        |
|         |                |                |                     | 30                              | 7                        |
|         |                |                |                     | 62                              | 22                       |
|         |                |                |                     | 95                              | 20                       |
|         |                |                |                     | 128                             | 5                        |
| P7      | 19542          | WT/WT          | P                   | 2                               | 4                        |
|         |                |                |                     | 20                              | 5                        |
|         |                |                |                     | 43                              | 7                        |
|         |                |                |                     | 63                              | 17                       |
|         |                |                |                     | 86                              | 15                       |
| P8      | 18969          | WT/WT          | P                   | 2                               | 25                       |
|         |                |                |                     | 22                              | 21                       |
|         |                |                |                     | 47                              | 10                       |
|         |                |                |                     | 68                              | 7                        |
|         |                |                |                     | 91                              | 15                       |
| P9      | 19559          | WT/WT          | LTNP                | 39*                             | 3                        |
|         |                |                |                     | 71*                             | 5                        |
|         |                |                |                     | 106*                            | 1                        |
|         |                |                |                     | 133*                            | 5                        |
|         |                |                |                     | 170*                            | 3                        |
| P10     | 19932          | WT/WT          | LTNP                | 54*                             | 3                        |
|         |                |                |                     | 120*                            | 5                        |
| P11     | 19417          | WT/WT          | LTNP                | 48*                             | 3                        |
|         |                |                |                     | 77*                             | 6                        |
|         |                |                |                     | 101*                            | 5                        |
|         |                |                |                     | 131*                            | 5                        |
| P12     | 19828          | $\Delta$ 32/WT | P                   | 4                               | 5                        |
|         |                |                |                     | 22                              | 2                        |
|         |                |                |                     | 25                              | 4                        |

|     |       |                 |      |      |    |
|-----|-------|-----------------|------|------|----|
|     |       |                 |      | 47   | 11 |
|     |       |                 |      | 63   | 4  |
| P13 | 19383 | $\Delta 32$ /WT | LTNP | 39*  | 2  |
|     |       |                 |      | 50*  | 2  |
|     |       |                 |      | 62*  | 4  |
|     |       |                 |      | 71*  | 4  |
|     |       |                 |      | 95*  | 3  |
|     |       |                 |      | 107* | 6  |
|     |       |                 |      | 133* | 7  |
|     |       |                 |      | 148* | 2  |
| P14 | 19922 | $\Delta 32$ /WT | LTNP | 39*  | 5  |
|     |       |                 |      | 82*  | 6  |
|     |       |                 |      | 111* | 5  |
|     |       |                 |      | 135* | 5  |
| P15 | 19663 | $\Delta 32$ /WT | LTNP | 47*  | 5  |
|     |       |                 |      | 91*  | 6  |
|     |       |                 |      | 111* | 6  |
|     |       |                 |      | 140* | 5  |
| P16 | 19984 | $\Delta 32$ /WT | LTNP | 19   | 6  |
|     |       |                 |      | 109  | 4  |
| P17 | 19566 | $\Delta 32$ /WT | LTNP | 13   | 2  |
|     |       |                 |      | 19   | 7  |
|     |       |                 |      | 101  | 3  |
|     |       |                 |      | 116  | 4  |
| P18 | 19956 | $\Delta 32$ /WT | LTNP | 28*  | 5  |
|     |       |                 |      | 51*  | 3  |
|     |       |                 |      | 78*  | 2  |
|     |       |                 |      | 123* | 1  |
|     |       |                 |      | 146* | 1  |

P: Progressor; LTNP: Long-term non-progressor; SC: seroconversion; \*Sampling time after imputed SC date.

**Table S2. Log marginal likelihood estimates for strict and relaxed clock analyses of four patient groups.**

|               | Progressors | LTNP     | WT       | $\Delta 32$ |
|---------------|-------------|----------|----------|-------------|
| Strict clock  | -28534.3    | -26762.8 | -33501.0 | -21793.5    |
| Relaxed clock | -28526.5    | -26756.7 | -33496.6 | -21789.3    |

WT: CCR5 wt/wt;  $\Delta 32$ : CCR5 wt/ $\Delta 32$ .

## SUPPLEMENTARY FIGURES

**Supplementary Figure 1. Codon model estimates.** Mean evolutionary rate estimated under relaxed clock, codon substitution model for four patient groups: Progressors, LTNP, CCR5 wt/wt and CCR5 wt/ $\Delta$ 32 (A).  $dN/dS$  rate ratios estimated for the same for patient groups (B). CCR5 wt/wt (WT); CCR5 wt/ $\Delta$ 32 ( $\Delta$ 32).

**A**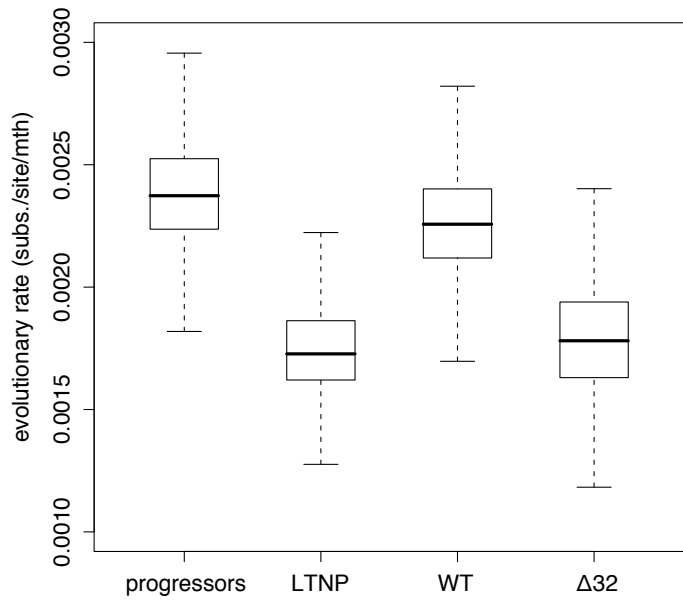**B**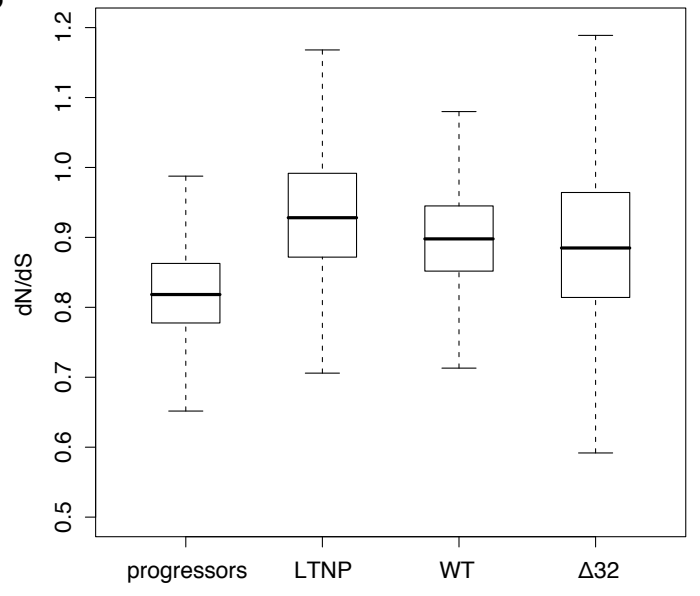

Supplement: supp_msq326_SupplementaryInformation.pdf [file supp_msq326_SupplementaryInformation.pdf]
